# Supplementary material for: Direct Derivatization in Dried Blood Spots for Oxidized and Reduced Glutathione Quantification in Newborns
Source: MDPI journal article supplement (doi:10.3390/antiox11061165), 2022-06-14
Supplement: s1 [file s1]

## Supporting Information

# Direct derivatization in Dried Blood Spots for Oxidized and Reduced Glutathione Quantification in Newborns

Isabel Ten-Doménech <sup>1</sup>, Álvaro Solaz-García <sup>1</sup>, Inmaculada Lara-Cantón <sup>1</sup>, Alejandro Pinilla-Gonzalez <sup>1</sup>, Anna Parra-Llorca <sup>1</sup>, Máximo Vento <sup>1,2</sup>, Guillermo Quintás <sup>3,4,\*</sup>, and Julia Kuligowski <sup>1,\*</sup>

<sup>1</sup> Neonatal Research Group, Health Research Institute La Fe, 46026 Valencia, Spain;  
isabel\_ten@iislafe.es (I.T.-D.); alvarosogar@gmail.com (Á.S.-G.);  
inmaculada\_lara@iislafe.es (I.L.-C.); alejandro\_pinilla@iislafe.es (A.P.-G.);  
parra\_ann@gva.es (A.P.-L.); maximo.vento@uv.es (M.V.);  
julia.kuligowski@uv.es

(J.K.)

<sup>2</sup> Division of Neonatology, University and Polytechnic Hospital La Fe, 46026 Valencia, Spain

<sup>3</sup> Health and Biomedicine, LEITAT Technological Center, 08225 Terrassa, Spain; gquintas@leitat.org (G.Q.)

<sup>4</sup> Unidad Analítica, Health Research Institute Hospital La Fe, 46026 Valencia, Spain

\* Correspondence: gquintas@leitat.org (G.Q.); julia.kuligowski@uv.es (J.K.); Tel.: +34-961-246-661 (J.K.)

## **Materials and Methods**

### *Preparation of stock, working and standard solutions*

Individual stock solutions of glutathione (GSH) and GSH-(*glycine*- $^{13}\text{C}_2$ ,  $^{15}\text{N}$ ) at a concentration of 10 mmol/L and 1 mmol/L, respectively, were prepared in phosphate buffer solution (PBS) (10 mmol/L, pH 7) containing *N*-ethylmaleimide (NEM) at a concentration of 100 mmol/L and kept at -20 °C. Individual stock solutions of oxidized glutathione (GSSG) and GSSG-D<sub>10</sub> at a concentration of 5 mmol/L and 0.8 mmol/L, respectively, were prepared in H<sub>2</sub>O (0.1% formic acid (FA), v/v) and kept at -20 °C. By mixing appropriate volumes of these individual solutions, a working solution of 2 mmol/L GSH-NEM and 100 µmol/L GSSG in H<sub>2</sub>O (0.1% FA, v/v) and an internal standard (IS) mixture of GSH- $^{13}\text{C}_2$ ,  $^{15}\text{N}$ -NEM and GSSG-D<sub>10</sub> at 100 µmol/L each were prepared. Calibration curves of GSH-NEM and GSSG were prepared freshly on each measurement day by serial dilution in perchloric acid (PCA) (1%, v/v) with FA (0.1%, v/v) at concentrations ranging from 185 to 190000 nmol/L and from 9 to 9400 nmol/L, respectively.

### *Sample treatment according to previous developed method [20]*

50 µL of blood were added to 10 µL of NEM 100 mmol/L in PBS and after 5 min of incubation at room temperature, 60 µL of cold PCA (8%, v/v) were added. Then, samples were thoroughly mixed and centrifuged at 10000 g for 15 min at 4 °C. Supernatant (10 µL) was added to 90 µL of H<sub>2</sub>O (0.1% FA, v/v). Finally, 5 µL of IS solution containing isotopically labelled GSH-NEM and GSSG at 100 µmol/L were added.

**Table S1.** Acquisition parameters and main figures of merit of the LC-MS/MS method.

| Analyte                                                 | m/z parent ion | Cone (V) | m/z daughter ion |         |        |         | Time window (min) | RT $\pm$ SD (min) | Calibration range (nmol/L) | Calibration curve fitting | R <sup>2</sup> | LOD (nmol/L) | LOQ (nmol/L) |
|---------------------------------------------------------|----------------|----------|------------------|---------|--------|---------|-------------------|-------------------|----------------------------|---------------------------|----------------|--------------|--------------|
|                                                         |                |          | Quant.           | CE (eV) | Conf.  | CE (eV) |                   |                   |                            |                           |                |              |              |
| GSH-NEM                                                 | 433.2          | 30       | 304.3            | 15      | 201.2  | 15      | 4.0 - 5.0         | 4.493 $\pm$ 0.005 | 185 - 190000               | Quadratic                 | 0.9996         | 14           | 185          |
| GSSG                                                    | 613.2          | 30       | 355.3            | 25      | 231.10 | 25      | 1.0 - 2.0         | 1.426 $\pm$ 0.007 | 9 - 9400                   | Linear                    | 0.997          | 3            | 9            |
| GSH- <sup>13</sup> C <sub>2</sub> , <sup>15</sup> N-NEM | 436.10         | 30       | 201.25           | 20      | -      | -       | 4.0 - 5.0         | 4.486 $\pm$ 0.005 | -                          | -                         | -              | -            | -            |
| GSSG-D <sub>10</sub>                                    | 623.0          | 35       | 355.1            | 20      | -      | -       | 1.0 - 2.0         | 1.416 $\pm$ 0.006 | -                          | -                         | -              | -            | -            |

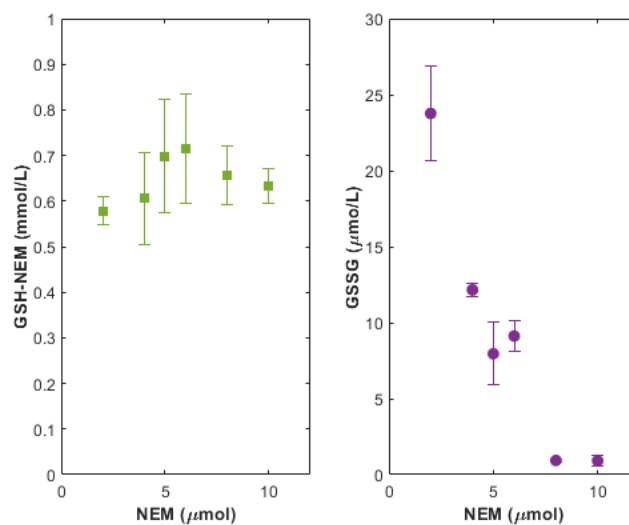

**Figure S1.** Determined GSH-NEM and GSSG concentrations in the same whole blood sample deposited on DBS paper cards pre-soaked with increasing amounts of NEM. Error bars represent standard deviation of replicates (N = 3).

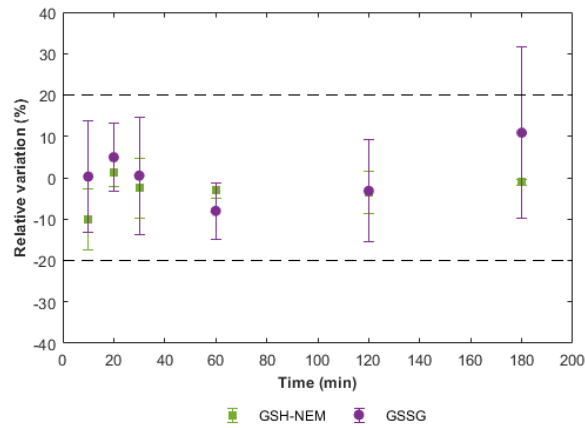

**Figure S2.** Relative variation in GSH-NEM and GSSG concentrations over time with respect to GSH-NEM and GSSG concentrations at  $t = 0$  for the same DBS sample. Error bars represent standard deviation of replicates ( $N = 3$ ).

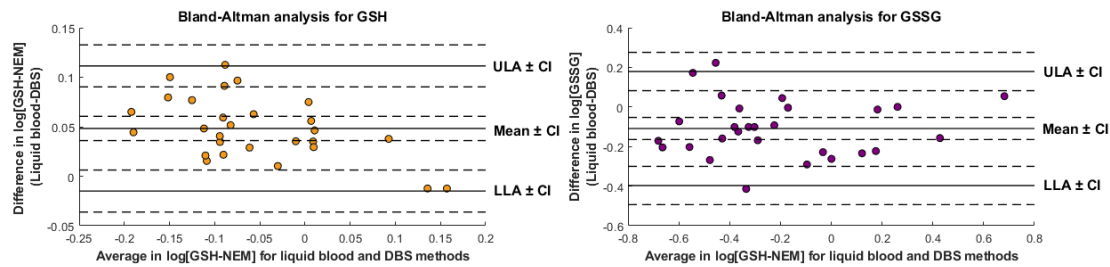

**Figure S3.** Bland-Altman plots with log-transformed data for the comparison between DBS method and liquid blood method for GSH-NEM and GSSG ( $N = 28$ ). Note: CI, 95% Confident Interval; LLA, lower limit of agreement; ULA, upper limit of agreement.

**Table S2.** Characteristics of the study population.

| Demographics                        | Term infants (N = 161) |
|-------------------------------------|------------------------|
| Gender, N (%)                       |                        |
| Male                                | 85 (53)                |
| Female                              | 76 (47)                |
| GA median (5-95% CI)                | 39 (39-40)             |
| Maternal age (5-95% CI)             | 33 (32-34)             |
| Birth weight (g), mean (SD)         | 3200 (500)             |
| Birth length (cm), mean (SD)        | 50 (2)                 |
| Birth HC (cm), mean (SD)            | 34.2 (1.3)             |
| Mode of birth, N (%)                |                        |
| Vaginal                             | 69 (43)                |
| C-section                           | 92 (57)                |
| 1-min Apgar score, median (IQR)     | 9 (8-10)               |
| 5-min Apgar score, median (IQR)     | 10 (10-10)             |
| Hematocrit <sup>a</sup> , mean (SD) | 49 (5)                 |

<sup>a</sup> calculated from 61 out of 73 cord blood samples

Note: GA, gestational age; CI, confidence interval; SD, standard deviation; HC, head circumference; IQR, interquartile range.

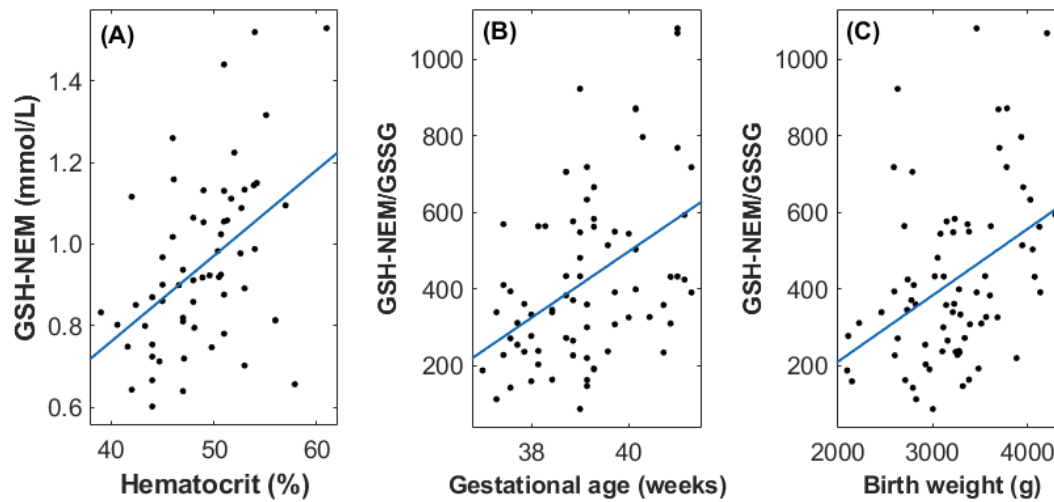

**Figure S4.** Linear fitting of GSH-NEM concentration in cord blood with hematocrit ( $r = 0.5$ ;  $p$ -value  $< 0.001$ ) (A); and GSH-NEM/GSSG with gestational age ( $r = 0.5$ ;  $p$ -value  $< 0.001$ ) (B), and birth weight ( $r = 0.4$ ,  $p$ -value  $< 0.001$ ) (C).

**Table S3.** GSH-NEM, GSSG, and GSH-NEM/GSSG median values (interquartile range) of cord blood and at discharge. Note: DBS samples were stored at 4 °C for 24h (short term storage, STS) and at -20 °C for 1 to 30 days (long term storage, LTS).

| Analyte          | Cord blood (N = 47) |           |                         | At discharge (N = 51)  |                        |                         |
|------------------|---------------------|-----------|-------------------------|------------------------|------------------------|-------------------------|
|                  | STS                 | LTS       | $p$ -value <sup>a</sup> | STS                    | LTS                    | $p$ -value <sup>a</sup> |
| GSH-NEM (mmol/L) | 0.9 (0.2)           | 1.0 (0.3) | 0.0010                  | 1.3 (0.4)              | 1.3 (0.4)              | 0.2                     |
| GSSG (μmol/L)    | 2 (2)               | 3 (2)     | 0.0003                  | 4 (2) <sup>b</sup>     | 4 (2) <sup>b</sup>     | 0.015                   |
| GSH/GSSG         | 400 (300)           | 300 (200) | 0.007                   | 370 (150) <sup>b</sup> | 330 (130) <sup>b</sup> | 0.03                    |

<sup>a</sup> Wilcoxon signed rank test for paired samples

<sup>b</sup> N = 48
